# Supplementary material for: The Global Prevalence of Anxiety Among Medical Students: A Meta-Analysis
Source: PubMed Central journal article supplement (PMC6696211; doi:10.3390/ijerph16152735), 2019-07-31
Supplement: ijerph-16-02735-s001.pdf [file ijerph-16-02735-s001.pdf]

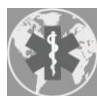

Supplementary Materials

| Section/topic             | # | Checklist item                                                                                                                                                                                                                                                                                              | Reported on page # |
|---------------------------|---|-------------------------------------------------------------------------------------------------------------------------------------------------------------------------------------------------------------------------------------------------------------------------------------------------------------|--------------------|
| <b>TITLE</b>              |   |                                                                                                                                                                                                                                                                                                             |                    |
| Title                     | 1 | Identify the report as a systematic review, meta-analysis, or both.                                                                                                                                                                                                                                         | 1                  |
| <b>ABSTRACT</b>           |   |                                                                                                                                                                                                                                                                                                             |                    |
| Structured summary        | 2 | Provide a structured summary including, as applicable: background; objectives; data sources; study eligibility criteria, participants, and interventions; study appraisal and synthesis methods; results; limitations; conclusions and implications of key findings; systematic review registration number. | 1                  |
| <b>INTRODUCTION</b>       |   |                                                                                                                                                                                                                                                                                                             |                    |
| Rationale                 | 3 | Describe the rationale for the review in the context of what is already known.                                                                                                                                                                                                                              | 1-2                |
| Objectives                | 4 | Provide an explicit statement of questions being addressed with reference to participants, interventions, comparisons, outcomes, and study design (PICOS).                                                                                                                                                  | 1-2                |
| <b>METHODS</b>            |   |                                                                                                                                                                                                                                                                                                             |                    |
| Protocol and registration | 5 | Indicate if a review protocol exists, if and where it can be accessed (e.g., Web address), and, if available, provide registration information including registration number.                                                                                                                               | 2                  |

|                                    |    |                                                                                                                                                                                                                        |            |
|------------------------------------|----|------------------------------------------------------------------------------------------------------------------------------------------------------------------------------------------------------------------------|------------|
| Eligibility criteria               | 6  | Specify study characteristics (e.g., PICOS, length of follow-up) and report characteristics (e.g., years considered, language, publication status) used as criteria for eligibility, giving rationale.                 | 2          |
| Information sources                | 7  | Describe all information sources (e.g., databases with dates of coverage, contact with study authors to identify additional studies) in the search and date last searched.                                             | 2          |
| Search                             | 8  | Present full electronic search strategy for at least one database, including any limits used, such that it could be repeated.                                                                                          | Appendix 1 |
| Study selection                    | 9  | State the process for selecting studies (i.e., screening, eligibility, included in systematic review, and, if applicable, included in the meta-analysis).                                                              | 2-3        |
| Data collection process            | 10 | Describe method of data extraction from reports (e.g., piloted forms, independently, in duplicate) and any processes for obtaining and confirming data from investigators.                                             | 3-4        |
| Data items                         | 11 | List and define all variables for which data were sought (e.g., PICOS, funding sources) and any assumptions and simplifications made.                                                                                  | 4          |
| Risk of bias in individual studies | 12 | Describe methods used for assessing risk of bias of individual studies (including specification of whether this was done at the study or outcome level), and how this information is to be used in any data synthesis. | 4          |

|                      |    |                                                                                                                                                           |   |
|----------------------|----|-----------------------------------------------------------------------------------------------------------------------------------------------------------|---|
| Summary measures     | 13 | State the principal summary measures (e.g., risk ratio, difference in means).                                                                             | 4 |
| Synthesis of results | 14 | Describe the methods of handling data and combining results of studies, if done, including measures of consistency (e.g., $I^2$ ) for each meta-analysis. | 4 |

|                               |    |                                                                                                                                                                 |                |
|-------------------------------|----|-----------------------------------------------------------------------------------------------------------------------------------------------------------------|----------------|
| Risk of bias across studies   | 15 | Specify any assessment of risk of bias that may affect the cumulative evidence (e.g., publication bias, selective reporting within studies).                    | 4              |
| Additional analyses           | 16 | Describe methods of additional analyses (e.g., sensitivity or subgroup analyses, meta-regression), if done, indicating which were pre-specified.                | 4              |
| <b>RESULTS</b>                |    |                                                                                                                                                                 |                |
| Study selection               | 17 | Give numbers of studies screened, assessed for eligibility, and included in the review, with reasons for exclusions at each stage, ideally with a flow diagram. | 3              |
| Study characteristics         | 18 | For each study, present characteristics for which data were extracted (e.g., study size, PICOS, follow-up period) and provide the citations.                    | Table 1        |
| Risk of bias within studies   | 19 | Present data on risk of bias of each study and, if available, any outcome level assessment (see item 12).                                                       | 18; Table S2   |
| Results of individual studies | 20 | For all outcomes considered (benefits or harms), present, for each study: (a) simple summary data for each intervention group (b) effect estimates and          | Figure 2 and 3 |

|                             |    |                                                                                                                                                                                      |                       |
|-----------------------------|----|--------------------------------------------------------------------------------------------------------------------------------------------------------------------------------------|-----------------------|
|                             |    | confidence intervals, ideally with a forest plot.                                                                                                                                    |                       |
| Synthesis of results        | 21 | Present results of each meta-analysis done, including confidence intervals and measures of consistency.                                                                              | 14-18; Figure 2 and 3 |
| Risk of bias across studies | 22 | Present results of any assessment of risk of bias across studies (see Item 15).                                                                                                      | 18, Table S2          |
| Additional analysis         | 23 | Give results of additional analyses, if done (e.g., sensitivity or subgroup analyses, meta-regression [see Item 16]).                                                                | 15-18; Figure 2 and 3 |
| <b>DISCUSSION</b>           |    |                                                                                                                                                                                      |                       |
| Summary of evidence         | 24 | Summarize the main findings including the strength of evidence for each main outcome; consider their relevance to key groups (e.g., healthcare providers, users, and policy makers). | 19-21                 |
| Limitations                 | 25 | Discuss limitations at study and outcome level (e.g., risk of bias), and at review-level (e.g., incomplete retrieval of identified research, reporting bias).                        | 19-21                 |
| Conclusions                 | 26 | Provide a general interpretation of the results in the context of other evidence, and implications for future research.                                                              | 19-21                 |
| <b>FUNDING</b>              |    |                                                                                                                                                                                      |                       |
| Funding                     | 27 | Describe sources of funding for the systematic review and other support (e.g., supply of data); role of funders for the systematic review.                                           | 21                    |

**Figure S1.** Preferred Reporting Items for Systematic Reviews and Meta-Analyses (PRISMA) checklist. *From:* Moher D, Liberati A, Tetzlaff J, Altman DG, The PRISMA Group (2009). Preferred Reporting Items for Systematic Reviews and Meta-Analyses: The PRISMA Statement. *PLoS Med* 6(7): e1000097. doi:10.1371/journal.pmed1000097  
For more information, visit: [www.prisma-statement.org](http://www.prisma-statement.org).

**Table S1.** Mean age, proportion of female medical students and proportion of single medical students in sixty-nine studies examining anxiety in medical students.

| First Author, Year             | Mean Age, Years | Female Medical Students, Number | Female Medical Students, % | Single Medical Students, Number | Single Medical Students, % |
|--------------------------------|-----------------|---------------------------------|----------------------------|---------------------------------|----------------------------|
| Abdallah, 2014                 | 18.02           | 197                             | 52.0                       | 375                             | 98.9                       |
| Ahmed, 2009                    | NR              | NR                              | NR                         | NR                              | NR                         |
| Akhtar, 2019                   | 24.92           | 76                              | 62.0                       | NR                              | NR                         |
| Akvardar, 2003                 | NR              | 175                             | 39.1                       | NR                              | NR                         |
| Alaqeel, 2017                  | NR              | NR                              | NR                         | NR                              | NR                         |
| Alvi, 2010                     | 21.40           | 202                             | 72.4                       | NR                              | NR                         |
| Amr, 2008                      | 20.70           | 147                             | 47.3                       | NR                              | NR                         |
| Ashton, 1995                   | 20.40           | 109                             | 58.6                       | NR                              | NR                         |
| Azad, 2017                     | 20.60           | 112                             | 74.6                       | NR                              | NR                         |
| Bassols, 2014                  | NR              | NR                              | NR                         | NR                              | NR                         |
| Baykan, 2012                   | 24.50           | 86                              | 44.6                       | 185                             | 95.8                       |
| Bogowicz, 2018                 | NR              | NR                              | NR                         | NR                              | NR                         |
| Casey, 2016                    | NR              | 62                              | 51.0                       | NR                              | NR                         |
| Chandavarkar, 2007             | NR              | 282                             | 66.0                       | NR                              | NR                         |
| Chen, 2018                     | 23.53           | 49                              | 34.3                       | NR                              | NR                         |
| Coentre, 2016                  | 23.25           | 304                             | 66.7                       | 422                             | 92.5                       |
| de Sousa, 2018                 | 21.69           | 336                             | 65.6                       | 498                             | 97.3                       |
| Del-Ben, 2013                  | 19.10           | 27                              | 31.8                       | NR                              | NR                         |
| Ediz, 2017                     | 21.99           | 458                             | 49.4                       | NR                              | NR                         |
| El-Gilany, 2008 (Egypt)        | 20.60           | 0                               | 0.0                        | NR                              | NR                         |
| El-Gilany, 2008 (Saudi Arabia) | 21.00           | 0                               | 0.0                        | NR                              | NR                         |
| Eller, 2006                    | 21.30           | 318                             | 77.0                       | NR                              | NR                         |
| Fawzy, 2017                    | 21.22           | 452                             | 64.6                       | 688                             | 98.3                       |
| Francis, 2019                  | 21.18           | 403                             | 64.8                       | 507                             | 81.5                       |
| Gan, 2019                      | 23.00           | 85                              | 57.0                       | 147                             | 98.7                       |
| Gaspersz, 2012                 | NR              | NR                              | NR                         | NR                              | NR                         |
| Ghudasara, 2011                | NR              | 147                             | 49.0                       | 262                             | 87.0                       |
| Haghighi, 2018                 | 22.04           | 101                             | 49.0                       | 174                             | 84.0                       |
| Hu, 2019                       | NR              | NR                              | NR                         | NR                              | NR                         |
| Ibrahim, 2013                  | 21.10           | 450                             | 100.0                      | 422                             | 93.8                       |
| Ibrahim, 2015                  | NR              | 82                              | 50.0                       | NR                              | NR                         |

|                     |       |      |       |     |      |
|---------------------|-------|------|-------|-----|------|
| Ibrayeva, 2018      | NR    | NR   | NR    | NR  | NR   |
| Iqbal, 2015         | NR    | NR   | NR    | NR  | NR   |
| Jafari, 2017        | NR    | NR   | NR    | NR  | NR   |
| James, 2017         | 23.91 | 264  | 42.4  | 509 | 81.7 |
| Karaoglu, 2010      | 19.02 | 128  | 44.1  | NR  | NR   |
| Knipe, 2018         | NR    | NR   | NR    | NR  | NR   |
| Kulsoom, 2015       | NR    | NR   | NR    | NR  | NR   |
| Kunwar, 2016        | NR    | NR   | NR    | NR  | NR   |
| Leao, 2011          | 24.60 | 63   | 44.0  | NR  | NR   |
| Liu, 1997           | 18.20 | NR   | NR    | NR  | NR   |
| Lupo, 2011          | 25.10 | NR   | NR    | 101 | 85.0 |
| Mahroon, 2018       | NR    | 194  | 63.2  | NR  | NR   |
| Manchevska, 2014    | NR    | NR   | NR    | NR  | NR   |
| Mayer, 2016         | 22.80 | 714  | 52.9  | NR  | NR   |
| Mousa, 2016         | NR    | NR   | NR    | NR  | NR   |
| Moutinho, 2017      | 22.10 | 425  | 55.8  | NR  | NR   |
| Moutinho, 2019      | 21.00 | 200  | 64.1  | NR  | NR   |
| Newbury-Birch, 2000 | 18.80 | NR   | NR    | NR  | NR   |
| Nimkuntod, 2016     | 19.51 | 121  | 56.8  | NR  | NR   |
| Pagnin, 2014        | 21.35 | 70   | 55.0  | NR  | NR   |
| Pickard, 2000       | NR    | NR   | NR    | NR  | NR   |
| Prinz, 2012         | NR    | 54   | 74.0  | NR  | NR   |
| Rab, 2008           | 20.70 | 87   | 100.0 | NR  | NR   |
| Rehmani, 2018       | 20.91 | 125  | 50.0  | NR  | NR   |
| Rezaei, 2018        | 21.69 | 281  | 50.8  | 548 | 99.1 |
| Samaranayake, 2011  | NR    | 132  | 51.8  | NR  | NR   |
| Saravanan, 2014     | NR    | 181  | 50.6  | NR  | NR   |
| Serra, 2015         | 22.70 | 402  | 61.2  | 642 | 97.7 |
| Shi, 2015           | 21.65 | 1897 | 64.9  | NR  | NR   |
| Sun, 2011           | 19.63 | 5455 | 53.8  | NR  | NR   |
| Talih, 2018         | NR    | NR   | NR    | NR  | NR   |
| Tempski, 2015       | 22.80 | 714  | 52.9  | NR  | NR   |
| van Venrooij, 2015  | 21.20 | 327  | 75.5  | NR  | NR   |
| Villacura, 2017     | 22.20 | 136  | 49.1  | NR  | NR   |
| Wahed, 2017         | 20.15 | 270  | 61.1  | 408 | 92.3 |
| Waqas, 2015         | 19.90 | NR   | NR    | NR  | NR   |

|             |       |     |      |    |    |
|-------------|-------|-----|------|----|----|
| Waqas, 2018 | 19.86 | 253 | 61.9 | NR | NR |
| Wolf, 1998  | 24.00 | 50  | 44.0 | NR | NR |
| Zhang, 2018 | 19.70 | 401 | 65.1 | NR | NR |

Abbreviations: NR, Not reported.



**Table S2.** Quality Appraisal & Ethical Approval of 30 studies examining prevalence of anxiety in medical students<sup>a</sup>

| Number | First Author, Year             | Selection (Maximum 5 Points) | Comparability (Maximum 2 Points) | Outcome (Maximum 3 Points) | Total Score | Ethical Approval |
|--------|--------------------------------|------------------------------|----------------------------------|----------------------------|-------------|------------------|
| 1      | Abdallah, 2014                 | 4                            | 1                                | 2                          | 7           | Y                |
| 2      | Ahmed, 2009                    | 4                            | 1                                | 2                          | 7           | N                |
| 3      | Akhtar, 2019                   | 4                            | 2                                | 2                          | 8           | Y                |
| 4      | Akvardar, 2003                 | 5                            | 2                                | 2                          | 9           | Y                |
| 5      | Alaqeel, 2017                  | 4                            | 1                                | 2                          | 7           | Y                |
| 6      | Alvi, 2010                     | 4                            | 1                                | 2                          | 7           | Y                |
| 7      | Amr, 2008                      | 5                            | 2                                | 2                          | 9           | Y                |
| 8      | Ashton, 1995                   | 4                            | 2                                | 2                          | 8           | N                |
| 9      | Azad, 2017                     | 4                            | 1                                | 2                          | 8           | N                |
| 10     | Bassols, 2014                  | 4                            | 2                                | 2                          | 8           | Y                |
| 11     | Baykan, 2012                   | 5                            | 1                                | 2                          | 8           | Y                |
| 12     | Bogowicz, 2018                 | 5                            | 2                                | 2                          | 9           | Y                |
| 13     | Casey, 2016                    | 4                            | 1                                | 2                          | 7           | Y                |
| 14     | Chandavarkar, 2007             | 5                            | 2                                | 2                          | 9           | Y                |
| 15     | Chen, 2018                     | 5                            | 2                                | 2                          | 9           | Y                |
| 16     | Coentre, 2016                  | 5                            | 1                                | 2                          | 8           | Y                |
| 17     | de Sousa, 2018                 | 4                            | 2                                | 2                          | 8           | Y                |
| 18     | Del-Ben, 2013                  | 4                            | 1                                | 2                          | 7           | Y                |
| 19     | Ediz, 2017                     | 4                            | 2                                | 2                          | 8           | Y                |
| 20     | El-Gilany, 2008 (Egypt)        | 4                            | 2                                | 2                          | 8           | Y                |
| 21     | El-Gilany, 2008 (Saudi Arabia) | 4                            | 2                                | 2                          | 8           | Y                |
| 22     | Eller, 2006                    | 5                            | 2                                | 2                          | 9           | Y                |
| 23     | Fawzy, 2017                    | 4                            | 2                                | 2                          | 8           | Y                |
| 24     | Francis, 2019                  | 5                            | 2                                | 2                          | 9           | Y                |
| 25     | Gan, 2019                      | 4                            | 2                                | 2                          | 8           | Y                |
| 26     | Gaspersz, 2012                 | 4                            | 1                                | 2                          | 7           | Y                |
| 27     | Ghudasara, 2011                | 5                            | 2                                | 2                          | 9           | Y                |
| 28     | Haghighi, 2018                 | 5                            | 2                                | 2                          | 9           | Y                |
| 29     | Hu, 2019                       | 5                            | 1                                | 2                          | 8           | Y                |
| 30     | Ibrahim, 2013                  | 4                            | 2                                | 2                          | 8           | Y                |

|    |                        |   |   |   |   |   |
|----|------------------------|---|---|---|---|---|
| 31 | Ibrahim, 2015          | 4 | 1 | 2 | 7 | N |
| 32 | Ibrayeva, 2018         | 4 | 2 | 2 | 8 | Y |
| 33 | Iqbal, 2015            | 4 | 2 | 2 | 8 | Y |
| 34 | Jafari, 2017           | 4 | 1 | 2 | 7 | Y |
| 35 | James, 2017            | 5 | 2 | 2 | 9 | Y |
| 36 | Karaoglu, 2010         | 4 | 1 | 2 | 7 | Y |
| 37 | Knipe, 2018            | 4 | 2 | 2 | 8 | Y |
| 38 | Kulsoom, 2015          | 4 | 2 | 2 | 8 | Y |
| 39 | Kunwar, 2016           | 4 | 1 | 2 | 7 | Y |
| 40 | Leao, 2011             | 4 | 1 | 2 | 7 | Y |
| 41 | Liu, 1997              | 5 | 2 | 2 | 9 | N |
| 42 | Lupo, 2011             | 4 | 2 | 1 | 7 | Y |
| 43 | Mahroon, 2018          | 5 | 2 | 2 | 9 | Y |
| 44 | Manchevska, 2014       | 4 | 1 | 2 | 7 | Y |
| 45 | Mayer, 2016            | 4 | 1 | 2 | 7 | Y |
| 46 | Mousa, 2016            | 5 | 1 | 2 | 8 | Y |
| 47 | Moutinho, 2017         | 5 | 1 | 2 | 8 | Y |
| 48 | Moutinho, 2019         | 5 | 2 | 2 | 9 | Y |
| 49 | Newbury-Birch,<br>2000 | 4 | 1 | 2 | 7 | N |
| 50 | Nimkuntod, 2016        | 5 | 1 | 2 | 8 | Y |
| 51 | Pagnin, 2014           | 5 | 2 | 2 | 9 | Y |
| 52 | Pickard, 2000          | 5 | 2 | 2 | 9 | N |
| 53 | Prinz, 2012            | 4 | 2 | 2 | 8 | N |
| 54 | Rab, 2008              | 4 | 2 | 2 | 8 | Y |
| 55 | Rezaei, 2018           | 5 | 2 | 2 | 9 | Y |
| 56 | Samaranayake,<br>2011  | 4 | 2 | 2 | 8 | Y |
| 57 | Saravanan, 2014        | 4 | 1 | 2 | 7 | Y |
| 58 | Serra, 2015            | 5 | 1 | 2 | 8 | Y |
| 59 | Shi, 2015              | 5 | 2 | 2 | 9 | Y |
| 60 | Sun, 2011              | 5 | 2 | 2 | 9 | Y |
| 61 | Talih, 2018            | 4 | 2 | 2 | 8 | Y |
| 62 | Tempski, 2015          | 4 | 1 | 2 | 7 | Y |
| 63 | van Venrooij, 2015     | 4 | 2 | 2 | 8 | Y |
| 64 | Villacura, 2017        | 5 | 1 | 2 | 8 | Y |
| 65 | Wahed, 2017            | 5 | 2 | 2 | 9 | Y |

|    |             |   |   |   |   |   |
|----|-------------|---|---|---|---|---|
| 66 | Waqas, 2015 | 4 | 1 | 2 | 7 | Y |
| 67 | Waqas, 2018 | 5 | 1 | 2 | 8 | Y |
| 68 | Wolf, 1998  | 4 | 2 | 2 | 8 | N |
| 69 | Zhang, 2018 | 4 | 2 | 2 | 8 | Y |

Abbreviations: Y, ethical approval provided; N, ethical approval not provided or not mentioned in article. <sup>a</sup> The adapted version of the Newcastle-Ottawa cohort scale for cross-sectional studies was used to appraise the quality of the sixty-nine studies. This adapted scale takes into consideration the selection of samples, comparability of subgroups and evaluation of outcome measures.

**Table S3.** Prevalence rate of anxiety stratified by gender as reported by twenty-four studies examining anxiety in medical students.

| First Author, Year             | Gender | Sample Size | Number of Medical Students with Anxiety | Prevalence of Anxiety, % |
|--------------------------------|--------|-------------|-----------------------------------------|--------------------------|
| Alvi, 2010                     | Female | 202         | 58                                      | 28.6                     |
|                                | Male   | 77          | 11                                      | 14.2                     |
| Amr, 2008                      | Female | 147         | 86                                      | 58.8                     |
|                                | Male   | 164         | 63                                      | 38.5                     |
| Ashton, 1995                   | Female | 109         | 33                                      | 30.0                     |
|                                | Male   | 77          | 12                                      | 16.0                     |
| Azad, 2017                     | Female | 112         | 45                                      | 39.8                     |
|                                | Male   | 38          | 15                                      | 38.6                     |
| De Sousa, 2018                 | Female | 336         | 39                                      | 11.6                     |
|                                | Male   | 176         | 14                                      | 7.9                      |
| El-Gilany, 2008 (Egypt)        | Male   | 304         | 191                                     | 62.9                     |
| El-Gilany, 2008 (Saudi Arabia) | Male   | 284         | 155                                     | 54.6                     |
| Eller, 2006                    | Female | 318         | 138                                     | 43.3                     |
|                                | Male   | 95          | 37                                      | 38.7                     |
| Ghodasara, 2011                | Female | 147         | 126                                     | 85.5                     |
|                                | Male   | 154         | 119                                     | 77.4                     |
| Ibrahim, 2015                  | Female | 82          | 60                                      | 73.6                     |
|                                | Male   | 82          | 47                                      | 57.2                     |
| Ibrayeva, 2018                 | Female | 634         | 286                                     | 45.1                     |
|                                | Male   | 844         | 350                                     | 41.4                     |
| Iqbal, 2015                    | Female | 208         | 21                                      | 10.0                     |
|                                | Male   | 145         | 15                                      | 10.3                     |
| Jafari, 2017                   | Female | 238         | 125                                     | 52.5                     |
|                                | Male   | 238         | 83                                      | 35.1                     |
| Karaoglu, 2010                 | Female | 128         | 48                                      | 37.5                     |
|                                | Male   | 225         | 53                                      | 23.4                     |
| Kunwar, 2016                   | Female | 280         | 44                                      | 15.8                     |
|                                | Male   | 258         | 31                                      | 12.0                     |
| Liu, 1997                      | Female | 371         | 169                                     | 45.6                     |
|                                | Male   | 166         | 42                                      | 25.3                     |
| Mahroon, 2018                  | Female | 187         | 82                                      | 43.7                     |
|                                | Male   | 120         | 47                                      | 38.8                     |
| Mayer, 2016                    | Female | 714         | 111                                     | 15.5                     |
|                                | Male   | 636         | 151                                     | 23.8                     |
| Newbury-Birch, 2000            | Female | 130         | 25                                      | 18.9                     |
|                                | Male   | 64          | 16                                      | 24.7                     |
| Pickard, 2000                  | Female | 90          | 11                                      | 12.4                     |
|                                | Male   | 46          | 20                                      | 43.0                     |
| Rab, 2008                      | Female | 87          | 32                                      | 37.0                     |
| Sun, 2011                      | Female | 5460        | 2129                                    | 39.0                     |
|                                | Male   | 4680        | 1357                                    | 29.0                     |
| Villacura, 2017                | Female | 136         | 17                                      | 12.5                     |
|                                | Male   | 141         | 18                                      | 12.7                     |
| Wahed, 2017                    | Female | 270         | 116                                     | 43.1                     |
|                                | Male   | 172         | 58                                      | 33.8                     |

**Table S4.** Prevalence rate of anxiety stratified by pre-clinical or clinical year of study reported by twenty-five studies examining anxiety in medical students.

| First Author, Year | Year       | Pre-Clinical or Clinical <sup>a</sup> | Sample Size | Number of Medical Students with Anxiety | Prevalence of Anxiety, % |
|--------------------|------------|---------------------------------------|-------------|-----------------------------------------|--------------------------|
| Akvardar, 2003     | M1         | Pre-clinical                          | 304         | 96                                      | 31.6                     |
|                    | Last year  | Clinical                              | 143         | 19                                      | 13.0                     |
| Alvi, 2010         | M2         | Pre-clinical                          | 86          | 53                                      | 61.6                     |
|                    | M3, M4, M5 | Clinical                              | 193         | 36                                      | 41.5                     |
| Azad, 2017         | M1,M2      | Pre-clinical                          | 134         | 21                                      | 15.7                     |
|                    | M3, M4, M5 | Clinical                              | 220         | 14                                      | 21.4                     |
| Bassols, 2014      | M1         | Pre-clinical                          | 110         | 34                                      | 30.8                     |
|                    | M6         | Clinical                              | 122         | 11                                      | 9.4                      |
| Baykan, 2012       | Last year  | Clinical                              | 193         | 97                                      | 50.3                     |
| Bogowicz, 2018     | M1, M2     | Pre-clinical                          | 624         | 199                                     | 31.9                     |
|                    | M5         | Clinical                              | 265         | 114                                     | 43.0                     |
| Coentre, 2016      | M4, M5     | Clinical                              | 456         | 90                                      | 19.8                     |
| Del-Ben, 2013      | M1         | Pre-clinical                          | 85          | 16                                      | 18.8                     |
|                    | M1, M2     | Pre-clinical                          | 249         | 31                                      | 12.4                     |
| Francis, 2019      | M3, M4, M5 | Clinical                              | 373         | 77                                      | 20.6                     |
| Gaspersz, 2012     | M1-M4      | Pre-clinical                          | 814         | 260                                     | 32.0                     |
|                    | M5, M6     | Clinical                              | 316         | 88                                      | 28.0                     |
|                    | M2, M3     | Pre-clinical                          | 202         | 37                                      | 31.7                     |
| Ibrahim, 2013      | M4, M5, M6 | Clinical                              | 248         | 39                                      | 37.5                     |
| Karaoglu, 2010     | M1, M2     | Pre-clinical                          | 290         | 11                                      | 10.3                     |
| Leao, 2011         | Last year  | Clinical                              | 144         | 39                                      | 27.0                     |
| Liu, 1997          | M1, M2     | Pre-clinical                          | 498         | 61                                      | 12.3                     |
|                    | M3         | Clinical                              | 39          | 6                                       | 15.4                     |
| Manchevska, 2014   | M1,M2      | Pre-clinical                          | 445         | 76                                      | 17.1                     |
| Nimkuntod, 2016    | M1,M2,M3   | Pre-clinical                          | 213         | 16                                      | 25.8                     |
| Pagnin, 2014       | M2         | Pre-clinical                          | 127         | 59                                      | 46.4                     |
| Prinz, 2012        | M4,M5      | Clinical                              | 73          | 5                                       | 6.8                      |

|                                  |            |              |       |      |      |
|----------------------------------|------------|--------------|-------|------|------|
| Rab, 2008 (female students only) | M1, M2     | Pre-clinical | 33    | 13   | 39.4 |
|                                  | M3, M4, M5 | Clinical     | 54    | 25   | 46.3 |
| Rezaei, 2018                     | M1,M2,M3   | Pre-clinical | 553   | 164  | 29.6 |
| Saravanan, 2015                  | M1, M2     | Pre-clinical | 182   | 24   | 33.6 |
|                                  | M3,M4,M5   | Clinical     | 176   | 29   | 44.3 |
| Serra, 2015                      | M1,M2      | Pre-clinical | 160   | 37   | 23.1 |
|                                  | M3-M6      | Clinical     | 497   | 104  | 20.9 |
| Sun, 2011                        | M1, M2     | Pre-clinical | 10140 | 1430 | 14.1 |
| van Venrooij, 2015               | M1-M4      | Pre-clinical | 433   | 126  | 29.1 |
| Wolf, 1998                       | M1         | Pre-clinical | 114   | 46   | 40.0 |

<sup>a</sup> Medical students are said to be in their pre-clinical years or clinical years as determined by their school curriculum.

**Table S5.** Comparison of prevalence rate of anxiety between medical students and non-medical students as reported by eight studies.

| First Author, Year | Sample Size of Medical Students | Number of Medical Students with Anxiety | Prevalence of Anxiety, % | Comparison Group                                   | Sample Size of Non-Medical Students | Number of Non-Medical Students with Anxiety | Prevalence of Anxiety, % |
|--------------------|---------------------------------|-----------------------------------------|--------------------------|----------------------------------------------------|-------------------------------------|---------------------------------------------|--------------------------|
| Bogowicz, 2018     | 889                             | 313                                     | 35.2                     | Law students                                       | 353                                 | 155                                         | 43.9                     |
| de Sousa, 2018     | 512                             | 121                                     | 23.6                     | Economics, finance and management students         | 240                                 | 40                                          | 16.8                     |
| Ibrahim, 2015      | 164                             | 72                                      | 43.9                     | Pharmacy students                                  | 164                                 | 48                                          | 29.3                     |
| Knipe, 2018        | 583                             | 145                                     | 24.9                     | Dentistry and Vet Science students                 | 556                                 | 166                                         | 29.9                     |
| Lupo, 2011         | 119                             | 35                                      | 29.4                     | Humanities and exact science students              | 51                                  | 26                                          | 51.0                     |
| Manchevska, 2014   | 445                             | 76                                      | 17.1                     | Law and Dentistry Students                         | 297                                 | 37                                          | 12.3                     |
| Prinz, 2012        | 73                              | 5                                       | 6.85                     |                                                    | 109                                 | 30                                          | 27.5                     |
| Samaranyake, 2011  | 255                             | 89                                      | 35.0                     | Nursing, health science, and architecture students | 339                                 | 84                                          | 24.8                     |
